# Supplementary material for: Co-occurrence of <em>Borrelia burgdorferi </em>sensu lato and <em>Babesia</em> spp. DNA in <em>Ixodes ricinus</em> Ticks Collected from Vegetation and Pets in the City of Poznań, Poland
Source: Preprints.org preprint supplement (doi:10.20944/preprints202403.0023.v1), 2024-03-01
Supplement: Supplementary file 1 [file supplementary]

Table S1. Sequences of the V4 16S rDNA region used in this study.

| **Species** | **GenBank acc. no.** |
| --- | --- |
| ASV01 | PP406298 |
| ASV02 | PP406293 |
| ASV03 | PP406303 |
| ASV04 | PP406292 |
| ASV05 | PP406300 |
| ASV06 | PP406302 |
| ASV07 | PP406304 |
| ASV08 | PP406305 |
| ASV09 | PP406296 |
| ASV10 | PP406297 |
| ASV11 | PP406299 |
| ASV12 | PP406294 |
| ASV14 | PP406295 |
| ASV15 | PP406306 |
| ASV16 | PP406290 |
| ASV17 | PP406291 |
| ASV18 | PP407998 |
| ASV19 | PP407999 |
| *B. afzelii* | CP075440 |
| *B. afzelii* | NZ_CP009212 |
| *B. anserina* | CP013704 |
| *B. bavariensis* | NC_6156 |
| *B. bissettiae* | CP002746 |
| *B. carolinensis* | NZ_CP132445 |
| *B. carolinensis* | NZ_CP132465 |
| *B. chilensis* | CP009910 |
| *B. coriaceae* | NZ_CP005745 |
| *B. crocidurae* | NZ_CP004267 |
| *B. duttonii* | NZ_AZIT01000001 |
| *B. garinii* | CP075451 |
| *B. garinii* | NZ_CP028861 |
| *B. garinii* subsp*. bavariensis* | NR_178227 |
| *B. hermsii* | NZ_CP011060 |
| *B. lusitaniae* | NZ_CP124050 |
| *B. maritima* | NZ_CP044535 |
| *B. miyamotoi* | MZ918969 |
| *B. miyamotoi* | MZ918974 |
| *B. miyamotoi* | MZ918983 |
| *B. miyamotoi* | MZ918981 |
| *B. parkeri* | NZ_CP007022 |
| *B. recurrentis* | NC_11244 |
| *B. spielmanii* | NZ_CP124042 |
| *B. turcica* | NZ_CP028884 |
| *B. turicatae* | NC_8710 |
| *B. valaisiana* | NZ_ABCY02000001 |
| *B. valaisiana* | U78154 |
| *B. valaisiana* | U78155 |
| *B. yangtzensis* | CP124002 |
| *Borrelia* sp. | AY570512 |
